# Supplementary material for: The contribution of age structure to the international homicide decline
Source: PLOS journal article supplement (doi:10.1371/journal.pone.0222996), 2019-10-09

**S6 Fig. Homicide rate trend by source for countries with combined series.** The Ratio corresponds to four-year average between the WHO homicide rate and the UN homicide rate between 1990 and 1993. The correlation corresponds to the Pearson correlation between the both rates over all overlapping years in the two series.

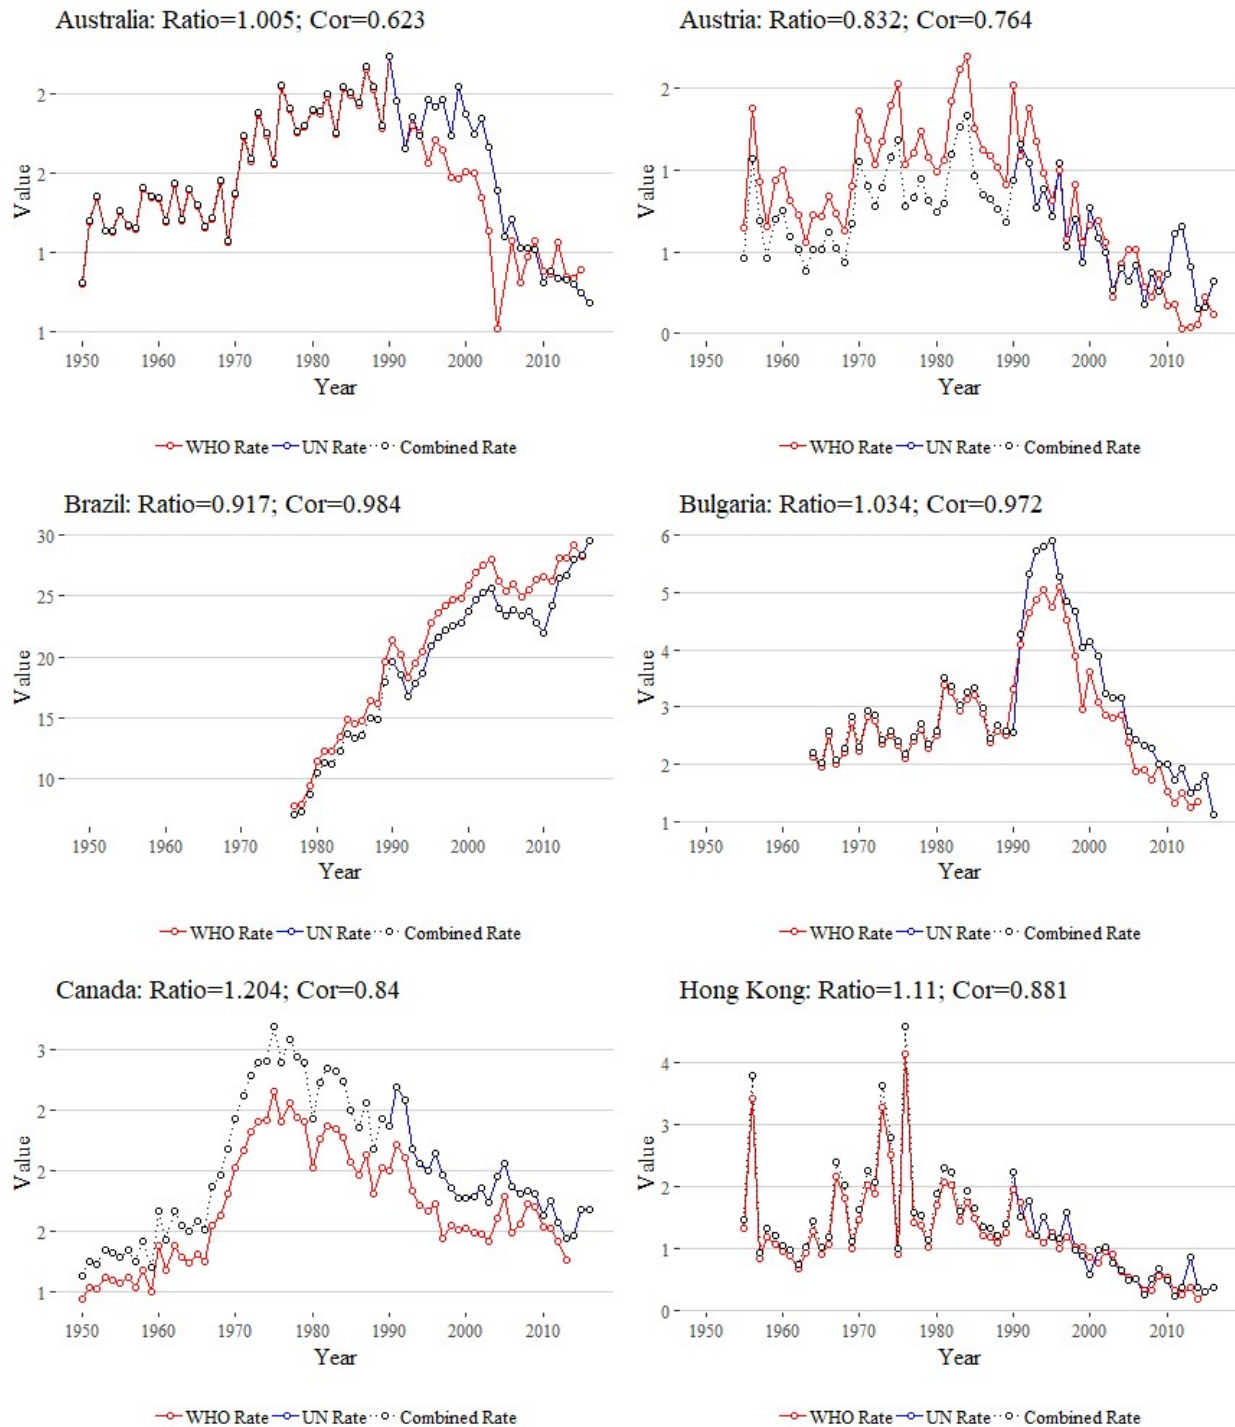

Colombia: Ratio=0.97; Cor=0.978

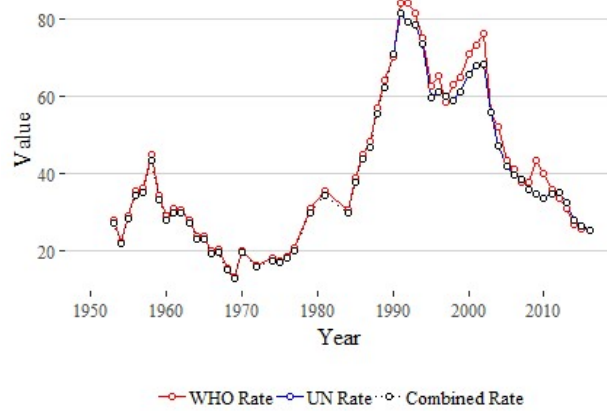

Costa Rica: Ratio=1.003; Cor=0.978

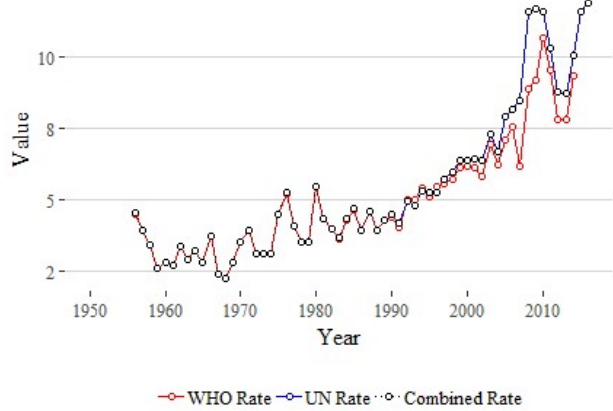

Denmark: Ratio=1.094; Cor=0.64

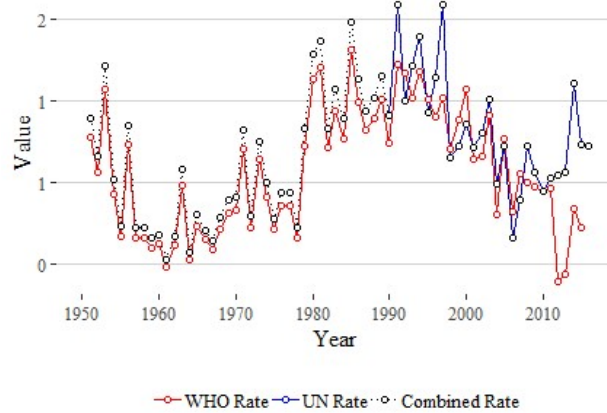

Ecuador: Ratio=0.79; Cor=0.896

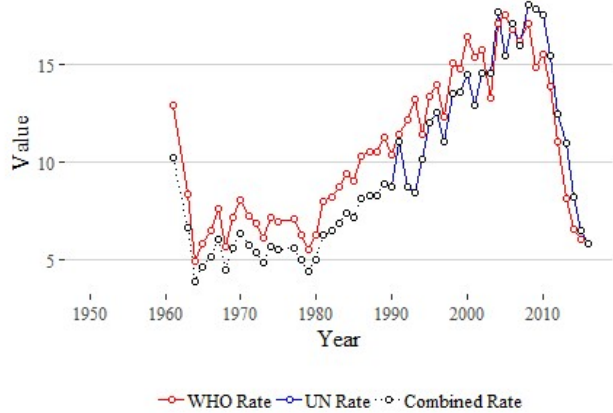

Finland: Ratio=0.909; Cor=0.922

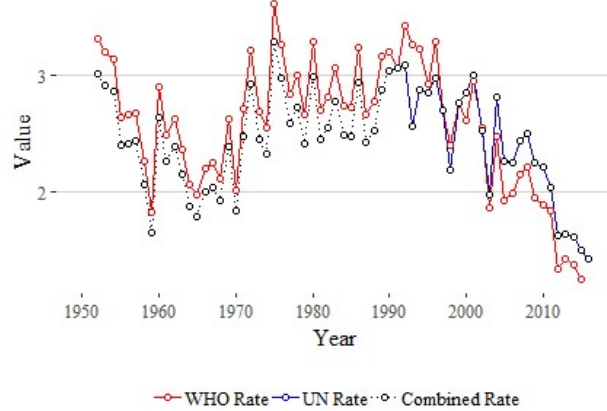

Greece: Ratio=1.028; Cor=0.885

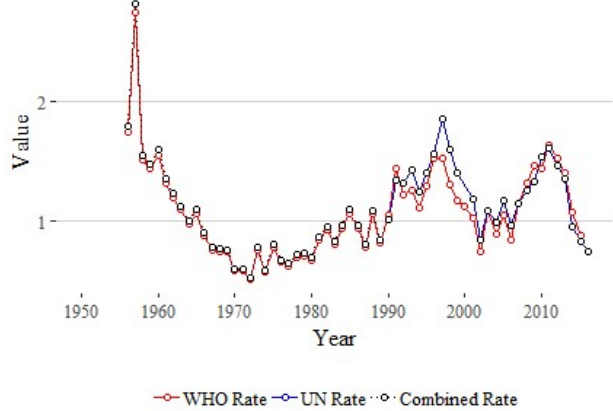

Hungary: Ratio=0.701; Cor=0.875

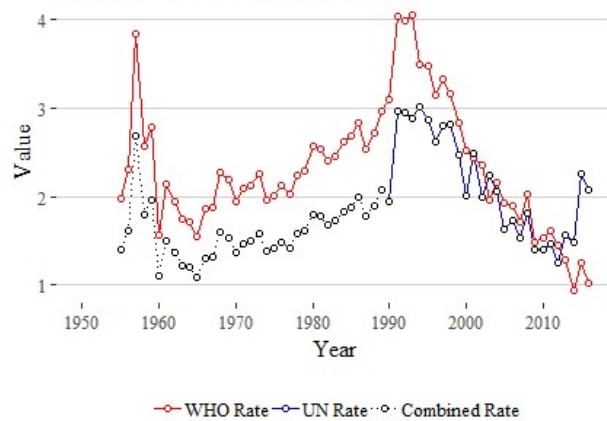

Ireland: Ratio=0.94; Cor=0.783

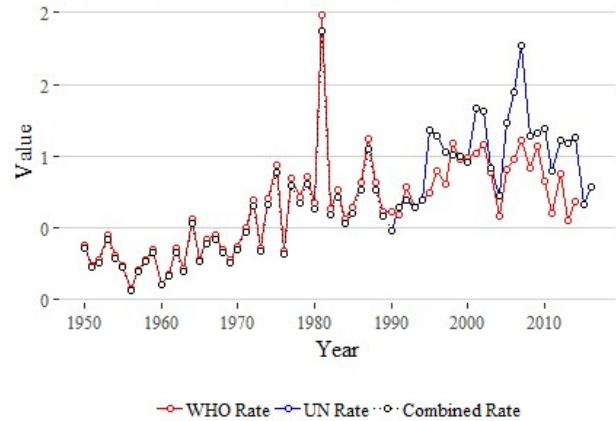

Italy: Ratio=1.152; Cor=0.996

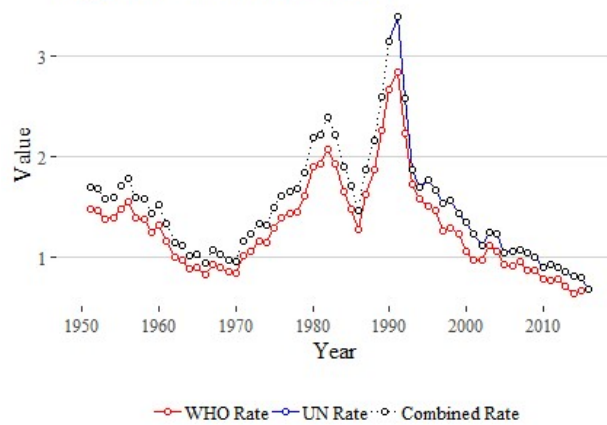

Japan: Ratio=0.841; Cor=0.924

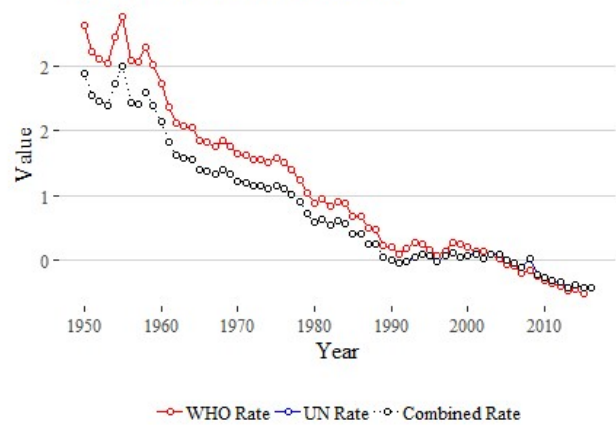

Mauritius: Ratio=0.889; Cor=0.819

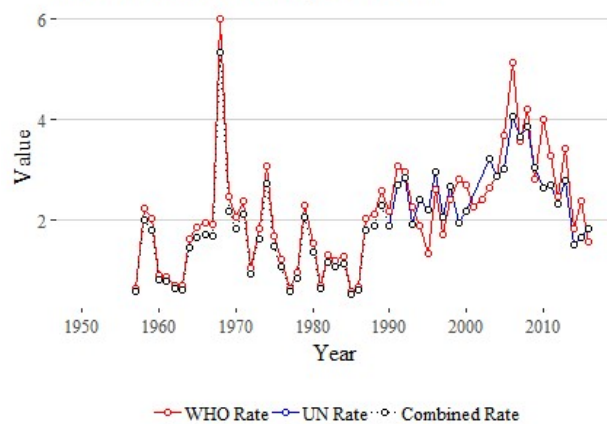

Mexico: Ratio=1.002; Cor=0.999

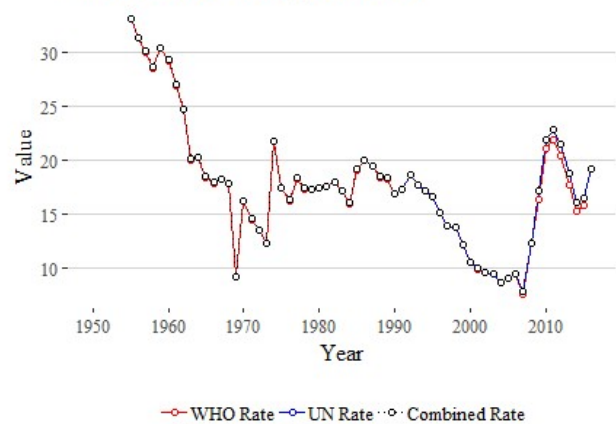

Netherlands: Ratio=1; Cor=0.999

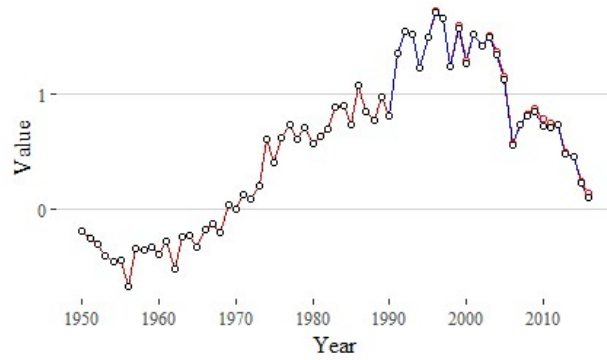

—○— WHO Rate —○— UN Rate ···○··· Combined Rate

New Zealand: Ratio=0.812; Cor=0.892

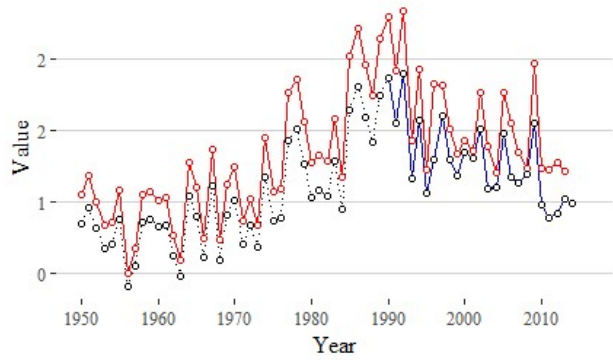

—○— WHO Rate —○— UN Rate ···○··· Combined Rate

Norway: Ratio=0.906; Cor=0.959

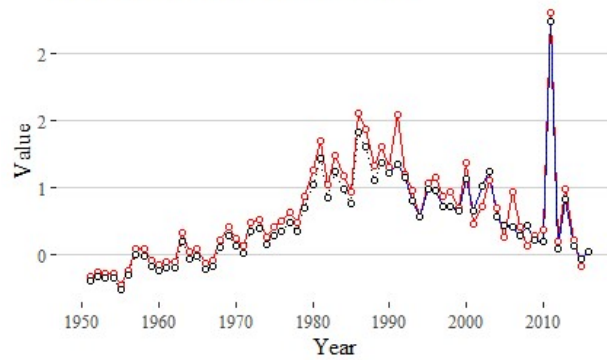

—○— WHO Rate —○— UN Rate ···○··· Combined Rate

Poland: Ratio=0.753; Cor=0.901

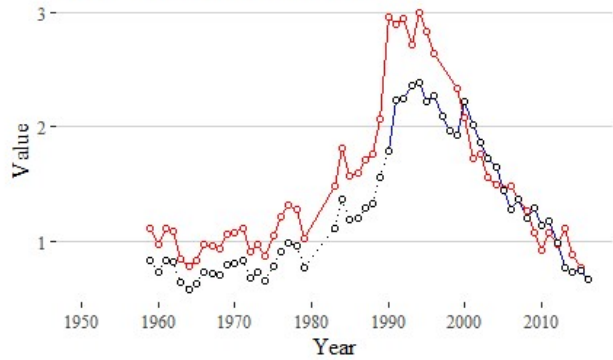

—○— WHO Rate —○— UN Rate ···○··· Combined Rate

Puerto Rico: Ratio=1.014; Cor=0.905

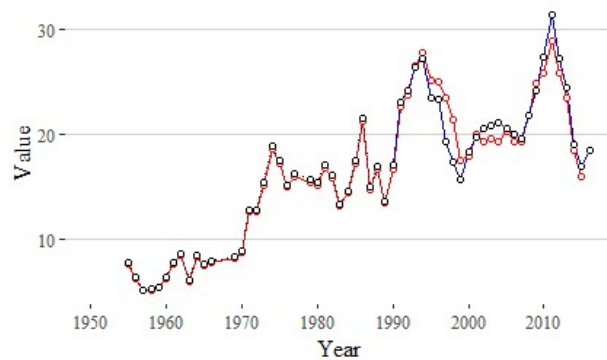

—○— WHO Rate —○— UN Rate ···○··· Combined Rate

Romania: Ratio=0.733; Cor=0.972

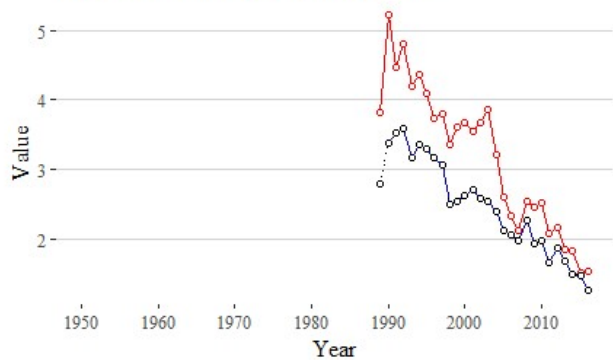

—○— WHO Rate —○— UN Rate ···○··· Combined Rate



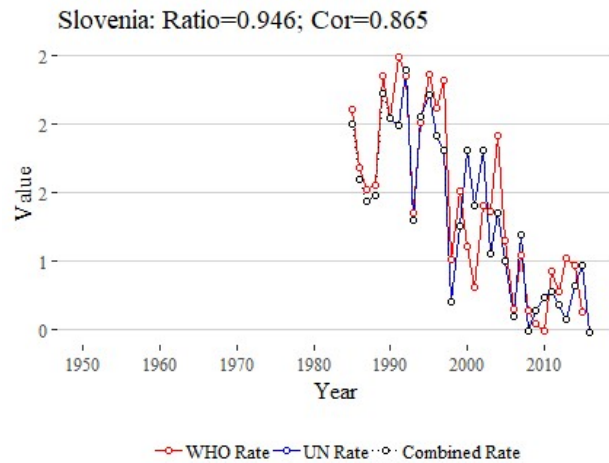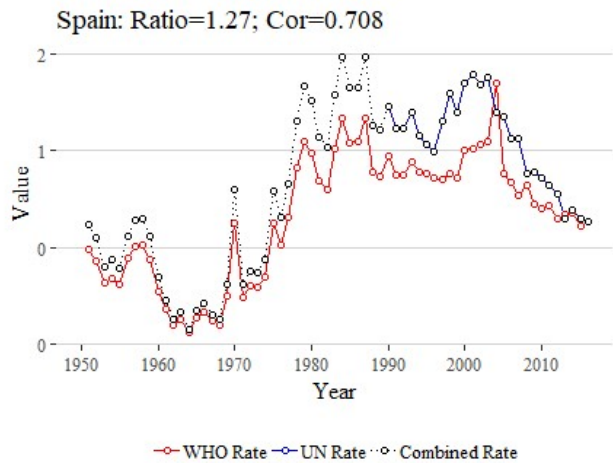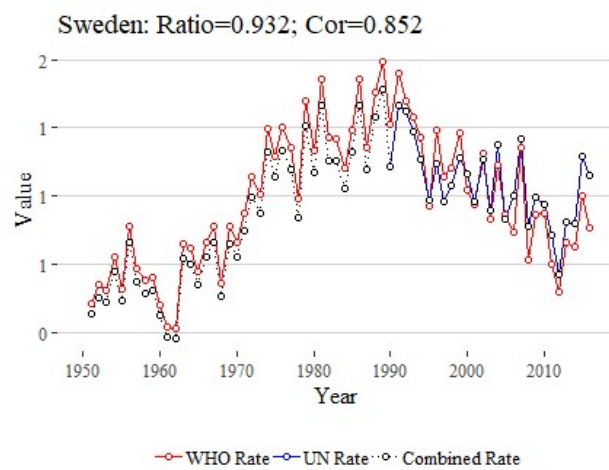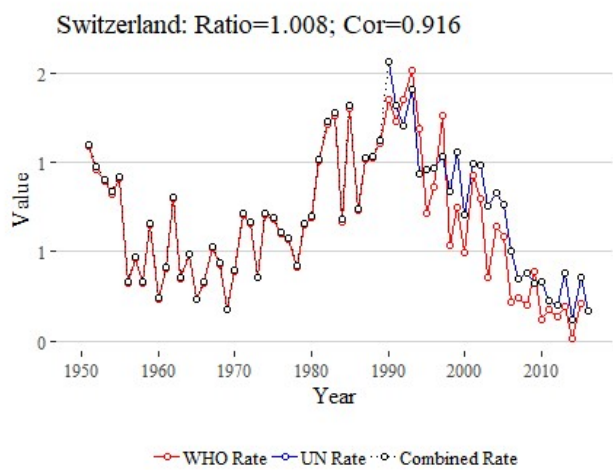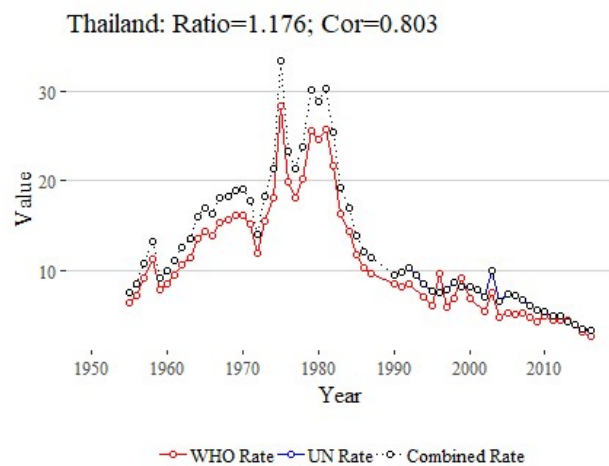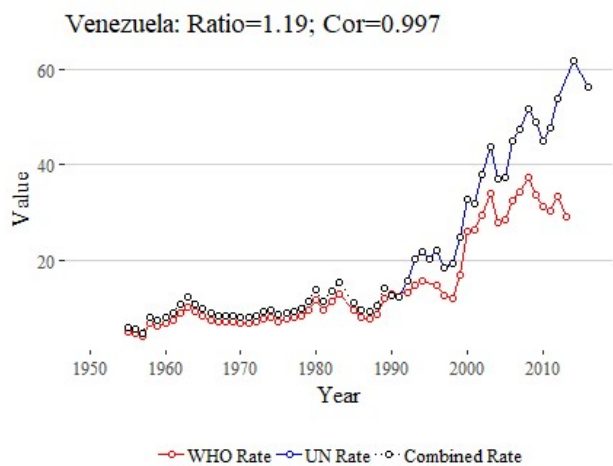

Supplement: S6 (10.1371/journal.pone.0222996.s006) [file journal.pone.0222996.s006]
