# Supplementary material for: The contribution of age structure to the international homicide decline
Source: PLOS journal article supplement (doi:10.1371/journal.pone.0222996), 2019-10-09

**S2 Fig. Homicide rate and GDP per capita – United States, 1950 to 2016.** Shown is the annual homicide rate per 100,000 population and the percent of the Gross Domestic Product (GDP) in the United States from 1950 to 2015. Homicide data are from the United Nations Office of on Drugs and Crime Homicide Database and the World Health Organization Mortality Database. Data on the GDP are from the World Bank and corresponds to constant 2010 US\$.

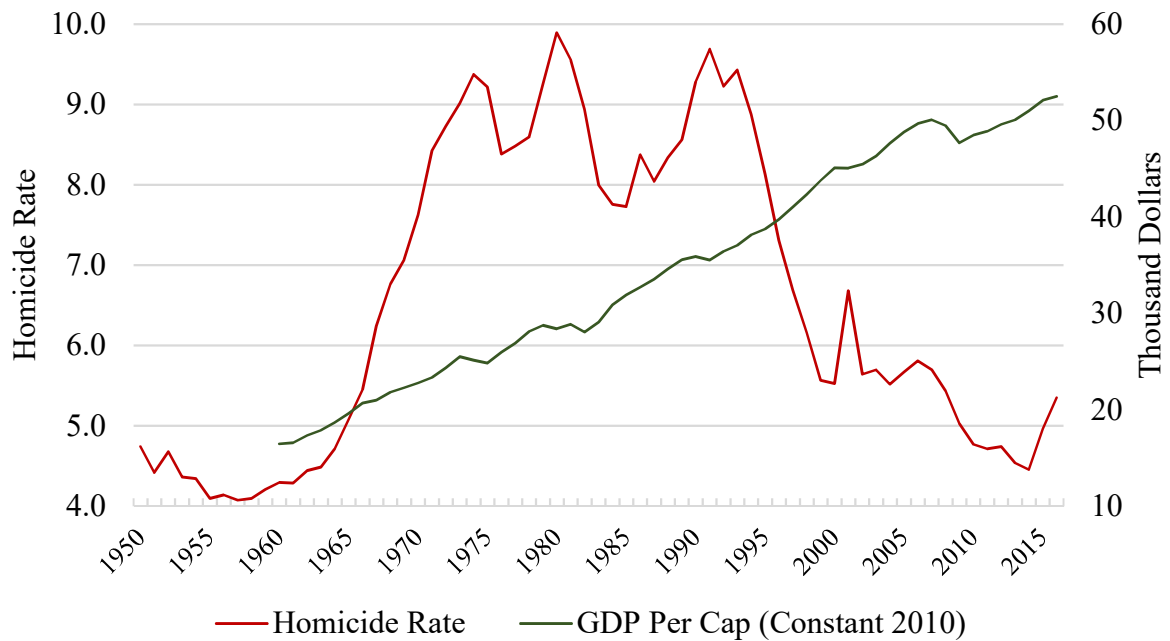

Supplement: S2 (10.1371/journal.pone.0222996.s002) [file journal.pone.0222996.s002]
