# Supplementary material for: The contribution of age structure to the international homicide decline
Source: PLOS journal article supplement (doi:10.1371/journal.pone.0222996), 2019-10-09
Supplement: S11 (10.1371/journal.pone.0222996.s011) [file journal.pone.0222996.s011]

**S2 Table. Classification codes for homicides in the WHO Mortality Database by version of the International Classification of Diseases (ICD).**

| List of ICD revision used | Description                                                                                                                                   | Codes for Homicide                           |
|---------------------------|-----------------------------------------------------------------------------------------------------------------------------------------------|----------------------------------------------|
| 07A                       | ICD 7 <sup>th</sup> revision, List A (condensed)                                                                                              | A149                                         |
| 07B                       | ICD 7 <sup>th</sup> revision, List B (condensed)                                                                                              | B050                                         |
| 08A                       | ICD 8 <sup>th</sup> revision, List A (condensed)                                                                                              | A148                                         |
| 08B                       | ICD 8 <sup>th</sup> revision, List B (condensed)                                                                                              | B050                                         |
| 09A,09B                   | ICD 9 <sup>th</sup> revision, Basic Tabulation List (condensed)                                                                               | B55                                          |
| 09N                       | ICD 9 <sup>th</sup> revision, Special List of causes (condensed) as reported by some countries of the newly independent States of former USSR | B55, CH17                                    |
| 09C                       | ICD 9 <sup>th</sup> revision, Special List of causes (condensed) as reported by China                                                         | C103                                         |
| 101                       | ICD10 Mortality Tabulation List 1(condensed)                                                                                                  | 1102, 1103                                   |
| 103                       | ICD10 3 (detailed) character list                                                                                                             | X85-X99; Y00-Y09                             |
| 104                       | ICD10 4 (detailed) character list                                                                                                             | X850-X999; Y000-Y099; Y871                   |
| 10M                       | ICD10 3 and 4 (detailed) character list                                                                                                       | X85-X99; Y00-Y09; X850-X999; Y000-Y099; Y871 |
| UE1                       | ICD10 special list for Portugal - data for 2004-2005                                                                                          | UE64                                         |
